# Supplementary material for: Purification–lithiation collaborative regeneration of mixed graphite/LiFePO4: building 2D Li+-diffusion channels towards enhanced energy-storage capabilities
Source: Royal Society of Chemistry journal article supplement (doi:10.1039/d4ta04717f), 2024-01-01
Supplement: d4ta04717f1.pdf [file d4ta04717f1.pdf]

**Supporting Information for:**

**Purification-lithiation Collaborative Regeneration of Mixed Graphite/LiFePO<sub>4</sub>: Building 2D Li<sup>+</sup>-diffusion Channels towards Enhanced Energy Storage Capabilities**

Zihao Zeng<sup>a</sup>, Xiangjin Lu <sup>a</sup>, Shuya Lei<sup>a</sup>, Hai lei<sup>a</sup>, Aigang Zhen<sup>c,d,e</sup>, Yuanlong Liu<sup>c</sup>, Xiaobo Ji<sup>b</sup>, Wei Sun <sup>a</sup>, Yue Yang<sup>a</sup> and Peng Ge<sup>a\*</sup>

a. School of Minerals Processing and Bioengineering, Central South University, Changsha 410083, China.

b. College of Chemistry and Chemical Engineering, Central South University, Changsha 410083, PR China.

c. Zhejiang Tianneng Advanced Material Co., Ltd, Huzhou 313000, China

d. Zhejiang Zhongchuang Resource Recycling Innovation Center Co., Ltd , Huzhou, 313000, China

e. Jiangsu Tianneng Advanced Material Co., Ltd, Yancheng 224500, China

\*Corresponding authors: Prof. Dr Peng Ge

E-mail of Prof. Dr. P. Ge: gp-gepeng@csu.edu.cn; gepeng219122@163.com

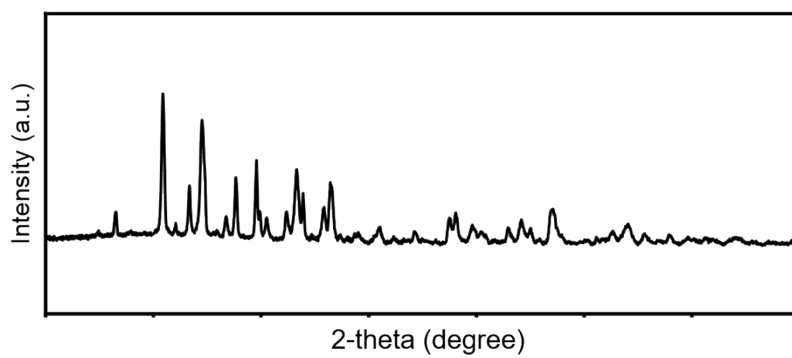

Figure S1. The XRD curves of LFP-3@Fe<sub>2</sub>O<sub>3</sub>.

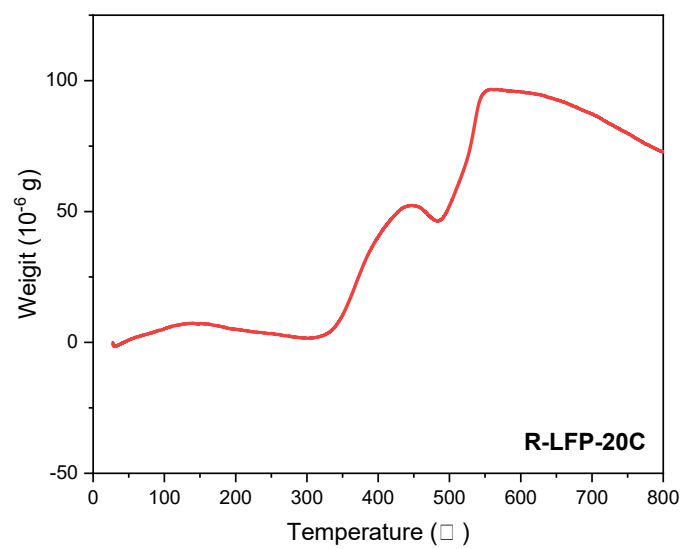

Figure S2. TG results of R-LFP-20C under Air.

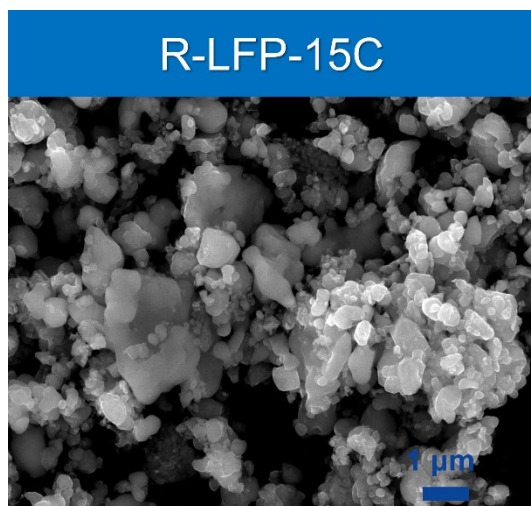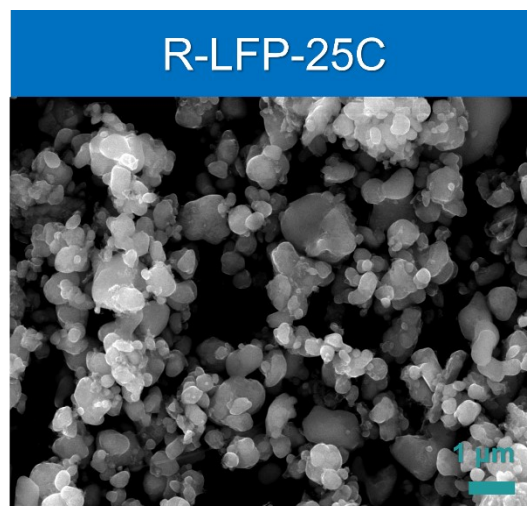

Figure S3. SEM images of R-LFP-15C and R-LFP-25C.

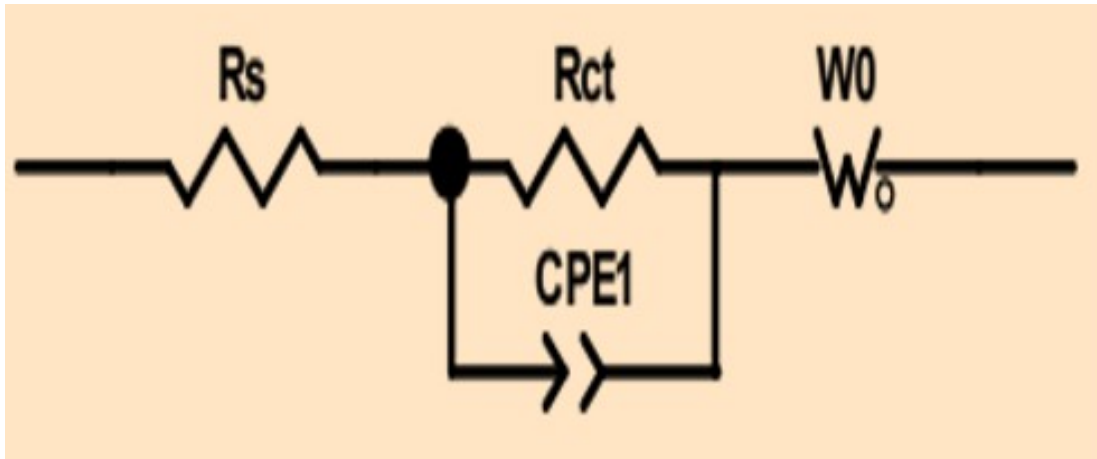

Figure S4. The equivalent circuit model in this work.

Table S1. The comparison of electrochemical performance about regenerated LiFePO<sub>4</sub> samples.

| <i>Samples</i>   | <i>Capacity<br/>(mAh g<sup>-1</sup>, C)</i> | <i>Capacity retention</i>            | <i>Ref.</i> |
|------------------|---------------------------------------------|--------------------------------------|-------------|
| <b>R-LFP</b>     | 137.1 at 1.0                                | 100%<br>after 250 cycles at 1.0 C    | [46]        |
| <b>R-LFP</b>     | 136.0 at 0.1                                | 98.6%<br>after 300 cycles at 1.0 C   | [31]        |
| <b>R-LFP</b>     | 129.43 at 0.5                               | 92.96%<br>after 1000 cycles at 1.0 C | [52]        |
| <b>R-LFP</b>     | 139.0 at 0.2                                | 95%<br>after 100 cycles at 0.2 C     | [53]        |
| <b>R-LFP</b>     | 103.1 at 1.0                                | 97.2%<br>after 300 cycles at 1.0 C   | [41]        |
| <b>R-LFP</b>     | 120.4 at 2.0                                | 97.3 %<br>after 150 cycles at 1.0 C  | [55]        |
| <b>R-LFP</b>     | 123.2 at 2.0                                | 98 %<br>after 250 cycles at 1.0 C    | [56]        |
| <b>R-LFP-20C</b> | 133.0 at 1.0                                | 100 %<br>after 500 cycles at 5.0 C   | This work   |

References:

1. Y. Xu, X. Qiu, B. Zhang, A. Di, W. Deng, G. Zou, H. Hou and X. Ji, *Green Chemistry*, 2022, **24**, 7448-7457.
2. Q. Sun, X. Li, H. Zhang, D. Song, X. Shi, J. Song, C. Li and L. Zhang, *Journal of Alloys and Compounds*, 2020, **818**.
3. Y. Song, B. Xie, S. Song, S. Lei, W. Sun, R. Xu and Y. Yang, *Green Chemistry*, 2021, **23**, 3963-3971.
4. L. Wang, J. Li, H. Zhou, Z. Huang, S. Tao, B. Zhai, L. Liu and L. Hu, *Journal of Materials Science: Materials in Electronics*, 2018, **29**, 9283-9290.
5. Q. Liang, H. Yue, S. Wang, S. Yang, K.-h. Lam and X. Hou, *Electrochimica Acta*, 2020, **330**.
6. F. Pei, Y. Wu, W. H. Zhang, X. Tian and J. Yu, *Advanced Materials Research*, 2013, **726-731**, 2940-2944.
7. D. Peng, X. Wang, S. Wang, B. Zhang, X. Lu, W. Hu, J. Zou, P. Li, Y. Wen and J. Zhang, *Green Chemistry*, 2022, **24**, 4544-4556.
8. Y. Zhu, X. Jiao, H. Bian, X.-Y. Lu and Z. Zhang, *Ionics*, 2023, **29**, 4569-4576.
9. C. Wang, X. Qiu, G. Shen, X. Chen, J. Wang, L. Xie, Q. Han, L. Zhu, J. Li and X. Cao, *Green Chemistry*, 2024, **26**, 1501-1510.
